# Supplementary material for: Ectoderm to mesoderm transition by down-regulation of actomyosin contractility
Source: PubMed Central journal article supplement (PMC7815211; doi:10.1371/journal.pbio.3001060), 2021-01-06
Supplement: pbio.3001060.s002.pdf [file pbio.3001060.s002.pdf]

**S2 Table.****List of morpholinos with injected amounts**

| Target     | Sequence                  | Amount/injected blastomere |
|------------|---------------------------|----------------------------|
| C-cadherin | CCACCGTCCCGAACGAAGCCTCAT  | 40ng                       |
| Rnd1a      | AGTACGGTGGGACAAATCCAACAAC | 20ng+                      |
| Rnd1b      | ACAAGTCCTAATTAAAAGCTCCACG | 20ng                       |
| ShirinS2a  | CTGGCCTCCCATTTTCCCAGAAGGT | 20ng+                      |
| ShirinS2b  | GCCTCCCATTTTCCCAGAGACACGA | 20ng                       |
