# Supplementary material for: Ectoderm to mesoderm transition by down-regulation of actomyosin contractility
Source: PubMed Central journal article supplement (PMC7815211; doi:10.1371/journal.pbio.3001060), 2021-01-06
Supplement: pbio.3001060.s009.pdf [file pbio.3001060.s009.pdf]

# S7 Fig

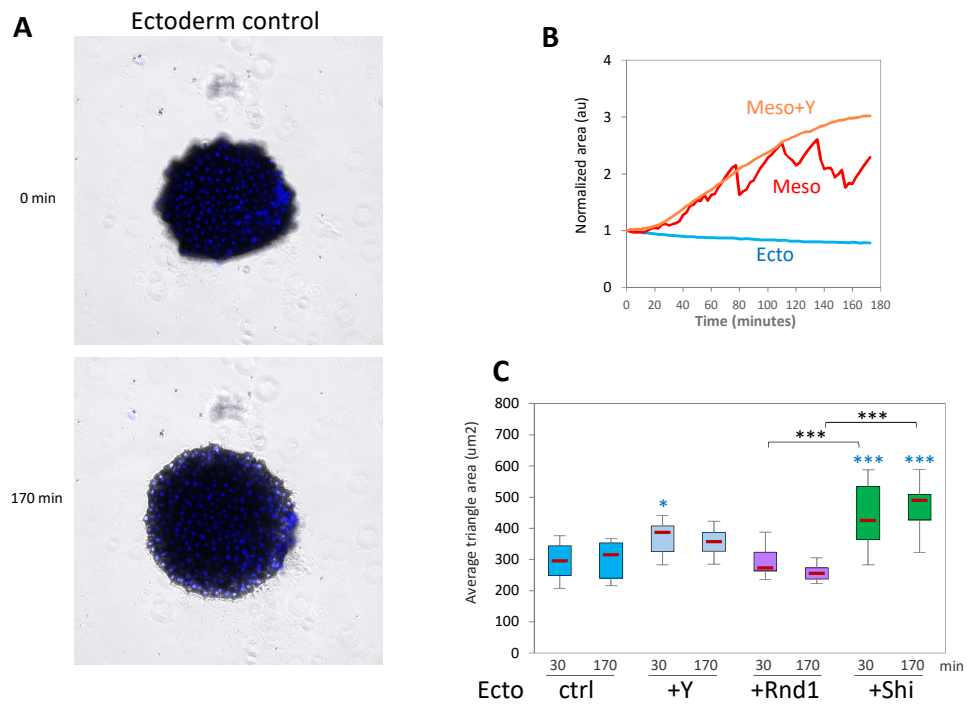

(Related to Figure 9): A) Example of ectoderm explant showing late partial spreading, which is only observed beyond the 120min. B) Examples of traces for single explants, illustrating the irregular expansion of mesoderm explants interrupted by retractions. In contrast, expansion of Y27632-treated mesoderm is smooth. C) Quantification of average triangle size at the initiation of spreading (30 min) and the end of the time lapse (170 min).
