# Supplementary material for: Ectoderm to mesoderm transition by down-regulation of actomyosin contractility
Source: PubMed Central journal article supplement (PMC7815211; doi:10.1371/journal.pbio.3001060), 2021-01-06
Supplement: pbio.3001060.s014.pdf [file pbio.3001060.s014.pdf]

## S2 Raw Image

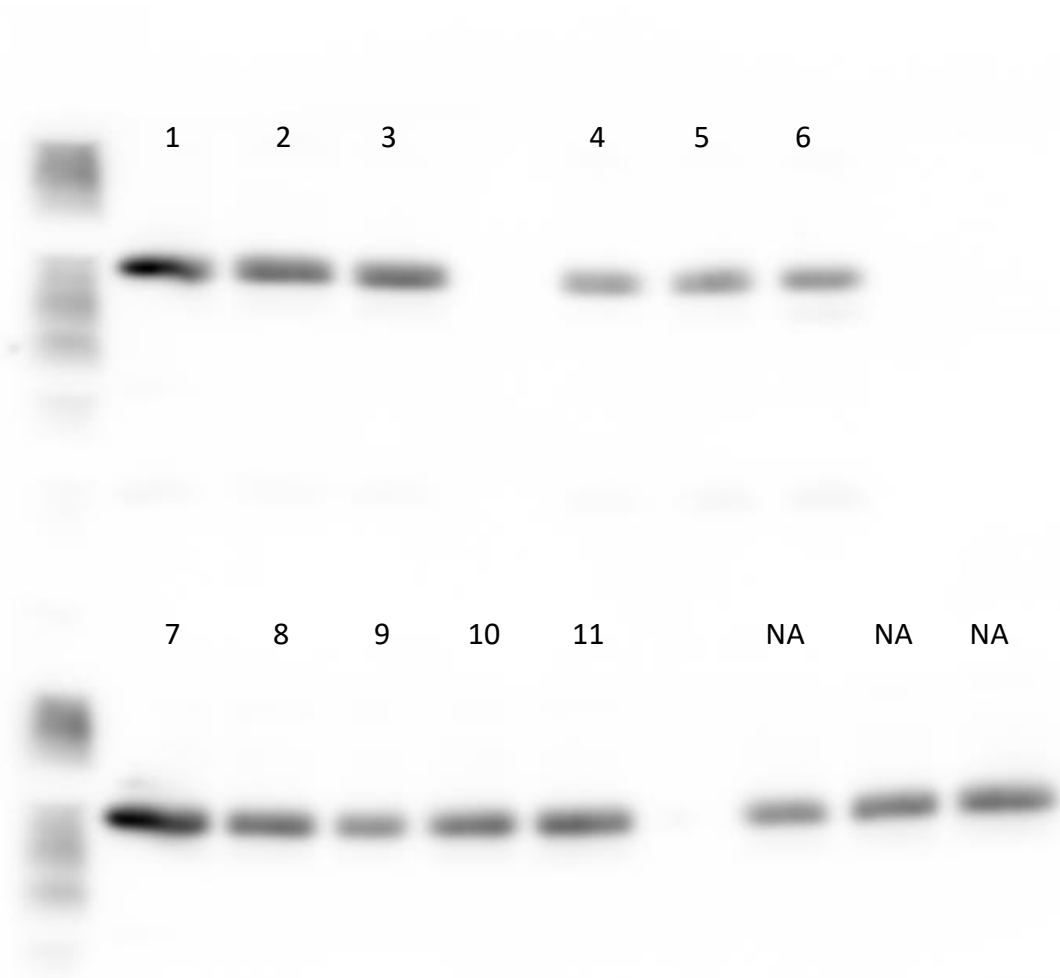

Western Blot for GAPDH (loading control) of ectoderm extracts (3 independent experiments). A dilution series of control of 3<sup>rd</sup> experiment (lanes 7-9) was used as standard for quantification. The numbered lanes correspond to the following conditions:  
1) control; 2) + Shirin; 3) + Rnd1 (Experiment 1)  
4) control; 5) + Shirin; 6) + Rnd1 (Experiment 2)  
7) control (2x amount); 8) control (1x); 9) control (1/2 amount); 10) + Shirin; 11) + Rnd1 (Experiment 3)  
NA: additional lanes not relevant for this study.
