# Supplementary material for: Ectoderm to mesoderm transition by down-regulation of actomyosin contractility
Source: PubMed Central journal article supplement (PMC7815211; doi:10.1371/journal.pbio.3001060), 2021-01-06
Supplement: pbio.3001060.s032.pdf [file pbio.3001060.s032.pdf]

The authors have addressed my comments satisfactorily and in my view the article is much improved by the additional experiments. Before publication, I have one remaining major issue that must be addressed. This is the relationship giving  $T_{AB}/C_{tB}$  (relationship (4)).

If I take the expressions (1) and (2) provided in the appendix and try to work out the relationships, I find something different from relationship (4).

Expression (2) can be rewritten to give  $C_{tA}$  as a function of  $T_{AB}$  and  $C_{tB}$ :

$$C_{tA} = -\frac{\cos b}{\cos a} C_{tB} - \frac{\cos c}{\cos a} T_{AB}$$

If we plug this expression into (1), we get:

$$-sina \frac{\cos b}{\cos a} C_{tB} - sina \frac{\cos c}{\cos a} T_{AB} + sinb \cdot C_{tB} + sinc \cdot T_{AB} = 0$$

Which can be rearranged as:

$$\left( sinb - sina \frac{\cos b}{\cos a} \right) C_{tB} + \left( sinc - sina \frac{\cos c}{\cos a} \right) T_{AB} = 0$$

And finally:

$$\frac{T_{AB}}{C_{tB}} = \frac{sinb - sina \frac{\cos b}{\cos a}}{sina \frac{\cos c}{\cos a} - sinc}$$

Which is different from (4) in the appendix. My guess is that (4) is in fact  $T_{AB}/C_{tA}$ . There is also an alpha that appears in their relationship, which I guess is a typo.

The authors should recheck their appendix and reevaluate everything that derives from (4). It would also be much clearer if they used some equation editing software – like Latex or the word equation editor. Relationship (6) is very difficult to read and could be simplified by noting that  $(T_{AB}/C_{tA})/(T_{AB}/C_{tB})$  is in fact  $C_{tB}/C_{tA}$ .
