# Supplementary material for: Ectoderm to mesoderm transition by down-regulation of actomyosin contractility
Source: PLoS Biol. 2021 Jan 6;19(1):e3001060. doi: 10.1371/journal.pbio.3001060 (PMC7815211; doi:10.1371/journal.pbio.3001060)
Supplement: S1 Data — (XLSX) [file pbio.3001060.s012.xlsx]

## Sheet: Fig1E
Comparison ectoderm - mesoderm, fraction of vinculin in FAs
	Ectoderm	Mesoderm
# exp	4	7
count	71	124
Mean	0.094	0.063
SD	0.08	0.03
Q1	0.04	0.04
Minimum	0.01	0.02
Median	0.073	0.058
Maximum	0.48	0.21
Q3	0.12	0.08
SD	0.08	0.03
Mean+SD	0.18	0.1
Mean-SD	0.01	0.03
IQR =Q3-Q1	0.08	0.03
1.5*IQR	0.11	0.05
Q1-1.5*IQR	-0.07	-0.01
Q3+1.5*IQR	0.23	0.12
Mean+SD-Q3	0.06	0.02
Q1-(Mean-SD)	0.03	0.01
Max wo Outliers	0.22	0.12
Min wo Outliers	0.01	0.02
Maxwoout-Q3	0.1	0.04
Q1-Minwoout	0.03	0.02
Ftest		0
Ttest		0.0019
individual experiments	Ectoderm	Mesoderm
20190118	0.176	NA
	0.131	NA
	0.081	NA
	0.116	NA
	0.065	NA
	0.041	NA
	0.073	NA
	0.245	NA
	0.049	NA
	0.012	NA
	0.036	NA
	0.039	NA
	0.143	NA
	0.083	NA
	0.046	NA
	0.104	NA
	0.055	NA
20190213	0.04	0.065
	0.053	0.119
	0.02	0.044
	0.013	0.041
	0.094	0.033
	0.027	0.069
	0.082	0.023
	0.041	0.037
	0.022	0.075
	0.046	0.168
	0.073	NA
	0.068	NA
	0.04	NA
20190301	NA	0.053
	NA	0.04
	NA	0.065
	NA	0.042
	NA	0.096
	NA	0.053
	NA	0.04
	NA	0.073
	NA	0.03
	NA	0.083
	NA	0.025
20190308	0.326	NA
	0.158	NA
	0.083	NA
	0.172	NA
	0.024	NA
	0.117	NA
	0.065	NA
	0.088	NA
	0.132	NA
	0.051	NA
	0.043	NA
	0.078	NA
	0.08	NA
	0.018	NA
	0.099	NA
	0.139	NA
	0.124	NA
	0.096	NA
	0.11	NA
20190315	NA	0.081
	NA	0.051
	NA	0.028
	NA	0.031
	NA	0.102
	NA	0.162
	NA	0.174
	NA	0.092
	NA	0.16
	NA	0.026
	NA	0.045
	NA	0.088
	NA	0.036
	NA	0.076
	NA	0.047
20190405	0.148	0.046
	0.099	0.055
	0.048	0.079
	0.029	0.045
	0.023	0.056
	0.078	0.057
	0.03	0.046
	0.043	0.038
	0.058	0.038
	0.097	0.045
	0.117	0.06
	0.044	0.053
	0.05	0.05
	0.04	NA
	0.043	NA
	0.397	NA
	0.245	NA
	0.037	NA
	0.14	NA
	0.476	NA
	0.218	NA
	0.088	NA
20190710	NA	0.078
	NA	0.06
	NA	0.062
	NA	0.078
	NA	0.06
	NA	0.062
	NA	0.041
	NA	0.034
	NA	0.062
	NA	0.09
	NA	0.061
	NA	0.058
	NA	0.055
	NA	0.041
	NA	0.074
	NA	0.058
	NA	0.074
	NA	0.048
	NA	0.019
	NA	0.106
20190718	NA	0.03
	NA	0.04
	NA	0.08
	NA	0.08
	NA	0.07
	NA	0.08
	NA	0.07
	NA	0.03
	NA	0.05
	NA	0.06
	NA	0.04
	NA	0.07
	NA	0.05
	NA	0.07
	NA	0.07
	NA	0.06
	NA	0.08
	NA	0.07
	NA	0.05
	NA	0.02
	NA	0.11
	NA	0.04
	NA	0.04
	NA	0.09
	NA	0.11
	NA	0.21
	NA	0.04
	NA	0.09
	NA	0.05
	NA	0.06
20190723	NA	0.072
	NA	0.084
	NA	0.084
	NA	0.044
	NA	0.049
	NA	0.068
	NA	0.047
	NA	0.06
	NA	0.024
	NA	0.046
	NA	0.017
	NA	0.022
	NA	0.052
	NA	0.034
	NA	0.029
	NA	0.062
	NA	0.044
	NA	0.127
	NA	0.075
	NA	0.028
	NA	0.058
	NA	0.037
	NA	0.058
	NA	0.128
	NA	0.066

## Sheet: FigS1B
Vinculin enrichment (intensity) and FA area
cell cortex mean (-bckg)	FA mean int (-bckg)	ratio intensity FA/cortex	ratio FA area/cell area	fraction vinc in FAs
1076.8	2436.75	2.26297	0.0778325	0.176132
1148.4	3783.91	3.29495	0.0396226	0.130555
10069.1	16716.6	1.66019	0.0490798	0.0814815
417.255	1180.92	2.83022	0.040991	0.116013
1899.8	2958.73	1.55739	0.041875	0.0652158
737.839	1958.41	2.65425	0.0155405	0.0412485
684.289	2010.81	2.93854	0.025	0.0734635
579.342	2132.49	3.68089	0.0666667	0.245393
7189.23	12636.7	1.75772	0.0280112	0.0492359
6336.61	12454.4	1.96547	0.00617284	0.0121325
2111.11	3999.72	1.89461	0.0191489	0.0362797
2373.73	4678.85	1.9711	0.0196404	0.0387131
11864.5	20904.1	1.7619	0.0810924	0.142877
7473.11	19135.1	2.56052	0.0325203	0.0832691
11300.9	16995.5	1.50391	0.030837	0.0463761
664.426	2146.43	3.2305	0.0323383	0.104469
5315.77	11754.4	2.21123	0.0248864	0.0550294

## Sheet: Fig1G
Comparison ectoderm - mesoderm, single cell migration speed, um/min
		Ecto	Meso
	# exp	9	10
	count	519	256
	Mean	0.396199	1.50788
	SD	0.358879	0.816294
	Q1	0.131481	0.94397
	Minimum	0	0.135356
	Median	0.280273	1.39449
	Maximum	2.45221	6.48018
	Q3	0.555407	1.90804
	SD	0.358879	0.816294
	Mean+SD	0.755077	2.32418
	Mean-SD	0.0373198	0.69159
	IQR =Q3-Q1	0.423926	0.964068
	1.5*IQR	0.635888	1.4461
	Q1-1.5*IQR	-0.504407	-0.502132
	Q3+1.5*IQR	1.1913	3.35414
	Mean+SD-Q3	0.19967	0.41614
	Q1-(Mean-SD)	0.0941615	0.25238
	Max wo Outliers	1.17318	3.27133
	Min wo Outliers	0	0.135356
	Maxwoout-Q3	0.617777	1.36329
	Q1-Minwoout	0.131481	0.808614
	Ftest		2.37857e-56
	Ttest		8.61561e-61
	individual experiments	Ecto	Meso
	20181212	0.968764	0.843024
		0.082432	0.51616
		0.253211	1.65308
		0.241075	0.148576
		0.211579	0.737078
		0.680416	2.10138
		0.509314	1.02057
		0.546721	0.648702
		0.172064	0.211785
		0.358807	0.742162
		0.387749	1.13786
		0.321489	1.56099
		0.236773	0.943651
		0.143122	0.713027
		0.0586317	1.39302
		0.272379	0.608514
		0.186418	0.365966
		0.115027	0.275113
		0.224694	1.12249
		0.694704	0.573977
		0.154474	0.274138
		0.149285	0.353979
		0.194461	0.618945
		1.13593	1.01156
		1.4031	0.878507
		0.359116	0.516818
		0.457784	1.02682
		0.0355283	0.784947
		0.0878308	0.590422
		0.080319	0.342679
		0.218254	1.06242
		0.0470143	1.30338
		0.507428	1.0514
		0.311915	0.598648
		0.149639	0.999227
		0.0237223	1.17177
		0.0537966	1.27678
		0.130885	0.411194
		0.119995	0.694079
		0.109032	0.979097
		0.113539	1.63508
		0.150125	1.28236
		0.0623495	1.77639
		0.320489	1.17645
		0.144726	0.706074
		0.446136	0.688652
		0.253082	0.843283
		NA	1.82363
		NA	0.816744
		NA	1.45652
		NA	0.748966
		NA	0.821852
		NA	0.784317
		NA	1.43824
		NA	0.944926
		NA	1.17999
		NA	NA
	20190111	1.14013	2.84243
		0.594708	1.53973
		0.991864	0.667527
		2.45221	1.29363
		0.744482	0.658151
		0.244263	2.30665
		0.224376	1.3469
		0.328801	0.969074
		0.0577778	1.39596
		0.100005	0.77996
		0.0288889	1.45776
		0.0657552	2.01868
		NA	3.41765
		0.232397	2.03338
		0.0785997	1.97453
		0.628545	0.514812
		0.138887	1.94588
		0.046496	0.438393
		0.267672	2.52098
		0.168878	1.90709
		0.13841	NA
		0.148433	NA
		0.510086	NA
		0.27743	NA
		0.428059	NA
		0.27707	NA
		0.133163	NA
		NA	NA
	20190115	0.764256	2.97816
		0.784278	3.71968
		1.52311	0.755203
		NA	1.66165
		NA	2.88348
		0.552508	2.28414
		0.0244522	1.86866
		0.212021	2.21549
		1.14524	1.31363
		0.442086	1.16879
		1.15317	1.71667
		0.266858	3.18554
		0.0763232	1.58774
		0.0964193	3.27133
		0.114986	0.52639
		0.187227	2.62099
		0.121032	0.135356
		0.172065	2.34318
		0.146486	0.686554
		0.957012	0.963833
		0.0172903	1.95278
		0.335716	3.1681
		0.981421	2.90425
		1.41876	3.60145
		NA	2.78625
		0.303214	2.78574
		0.125114	1.23108
		0.051871	2.95457
		0.172903	3.06064
		0.156728	1.8945
		0.317275	3.59363
		0.959261	1.61745
		0.441114	NA
		0.669441	NA
		0.297856	NA
		0.351083	NA
		0.411088	NA
		0.992649	NA
		0.294776	NA
		0.865176	NA
		1.94018	NA
		0.222036	NA
		0.74111	NA
		0.27231	NA
		0.844057	NA
		0.312341	NA
		0.31665	NA
		0.400258	NA
		0.0864516	NA
		0.354083	NA
		0.0976952	NA
		0.0244522	NA
		1.36607	NA
		1.28289	NA
		1.13417	NA
		0.739408	NA
		0.0172903	NA
		NA	NA
		0.628682	NA
		0.524873	NA
		0.0905333	NA
		0.125114	NA
		0.410775	NA
		0.593428	NA
		0.0763232	NA
		0.350002	NA
		0.133277	NA
		0.307985	NA
		0.132276	NA
		1.09211	NA
		1.90542	NA
		1.23742	NA
		1.2645	NA
		0.119067	NA
		0.31755	NA
		0.390923	NA
		0.464875	NA
		1.06153	NA
		0.623005	NA
		0.103742	NA
		NA	NA
		1.24664	NA
		1.1499	NA
		0.156728	NA
		NA	NA
		1.47642	NA
		0.0345806	NA
		0.121032	NA
		0.107937	NA
		0.0864516	NA
		0.0590329	NA
		0.117791	NA
		0.882073	NA
		0.724068	NA
		1.47035	NA
		1.06832	NA
		0.324844	NA
		0.497456	NA
		0.0590329	NA
		0.538361	NA
		0.0691613	NA
		0.667705	NA
		0.0763232	NA
	20180920	0.545024	0.953863
		0.370076	1.04095
		0.329517	1.48555
		0.269748	1.8287
		0.167664	1.77625
		0.622398	1.72508
		0.202864	1.50716
		0.80781	2.18407
		0.547134	2.34843
		0.30801	1.32574
		0.0946516	1.65253
		0.280273	2.8347
		0.309401	0.857899
		0.162585	1.36963
		0.106099	1.3131
		0.110393	0.649566
		0.286259	1.21399
		0.341948	0.792323
		0.519415	1.86956
		0.488933	2.95726
		0.242923	1.16872
		0.274565	3.37726
		0.333922	0.952652
		0.372352	6.48018
		0.313431	1.59239
		0.105724	1.33514
		0.144974	1.64163
		0.422336	1.00266
		0.197896	1.26231
		0.44834	1.1017
		0.178109	1.5698
		NA	0.869806
		NA	1.00147
		NA	2.48607
		NA	0.837201
		NA	2.05438
		NA	1.53088
		NA	1.01092
		NA	1.78619
		NA	1.23958
		NA	1.87962
		NA	1.15231
		NA	1.27602
		NA	3.38224
		NA	1.54004
		NA	1.58926
		NA	1.47219
		NA	2.27058
		NA	1.42927
		NA	0.874436
		NA	0.425902
		NA	1.44088
		NA	1.46945
		NA	0.994691
		NA	1.09972
		NA	1.36072
		NA	3.59765
		NA	2.04308
		NA	1.8251
		NA	0.598365
		NA	1.7987
		NA	0.731717
		NA	1.89817
		NA	1.98623
		NA	1.10018
		NA	0.795467
		NA	1.18598
		NA	1.94981
		NA	1.919
		NA	1.52511
		NA	0.937964
		NA	1.05364
		NA	0.911344
		NA	0.384342
		NA	0.925715
		NA	1.96037
		NA	1.16355
		NA	1.02093
		NA	1.79142
		NA	1.26146
		NA	1.85871
		NA	0.656643
		NA	1.22118
		NA	1.66676
		NA	1.75035
		NA	1.07724
		NA	2.00753
		NA	1.5615
		NA	1.5615
		NA	1.90644
		NA	0.620401
		NA	0.791698
		NA	1.34631
		NA	0.530933
		NA	1.13369
		NA	1.08234
		NA	2.06491
		NA	0.625496
		NA	2.06939
		NA	0.359026
		NA	0.680572
	20181004	0.330925	2.56058
		0.201378	1.49656
		0.2924	1.15356
		0.374973	1.37912
		0.0721756	1.78395
		0.0620907	2.53863
		0.277911	2.1785
		0.150968	1.43106
		0.329611	1.46853
		0.250966	1.37663
		0.422096	1.55935
		0.524345	1.14111
		0.129203	1.48272
		0.503224	1.87735
		0.238854	1.82614
		0.613595	0.909321
		0.887334	1.7032
		0.180164	1.97756
		0.0383835	2.37997
		0.132632	2.4338
		0	3.05229
		1.30768	1.97966
		0.501508	2.06594
		0.115047	1.19992
		0.114277	2.15304
		0.469408	1.76216
		0.392273	3.23403
		0.28041	1.4052
		0.0970932	1.56723
		0.141166	1.64692
		0.313845	1.67856
		0.0503226	2.85154
		0.0858509	0.563518
		0.242664	2.02946
		0.23865	1.64597
		0.162829	1.35978
		0.101678	2.48058
		0.551662	0.571218
		0.164599	1.28045
		0.085232	2.06841
		0.193532	1.08026
		0.0760799	1.4639
		0.193555	1.18722
		1.1567	1.59714
		0.237313	2.17814
		0.100645	1.91372
		0.0467706	1.90835
		0.568707	NA
		0.304631	NA
	20181009	0.325564	NA
		0.207617	NA
		0.0922581	NA
		0.0839037	NA
		0.662948	NA
		0.215385	NA
		0.131481	NA
		0.1779	NA
		0.215358	NA
		0.186551	NA
		0.0691318	NA
		0.637087	NA
		0.416246	NA
		0.541116	NA
		1.19999	NA
		0.311473	NA
		0.937869	NA
		0.158148	NA
		0.352461	NA
		0.29627	NA
		0.215352	NA
		0.0640306	NA
		0.328078	NA
		0.262102	NA
		0.217987	NA
		0.181374	NA
		0.406981	NA
		0.316057	NA
		0.191238	NA
		0.310992	NA
		0.427418	NA
		0.185168	NA
		0.185747	NA
		0.699817	NA
		0.363486	NA
		0.302447	NA
		0.165694	NA
		0.355684	NA
		0.335473	NA
		0.0677483	NA
		0.105435	NA
		0.080993	NA
		0.40035	NA
		0.15485	NA
		0.331686	NA
		0.412153	NA
		0.135226	NA
		0.801243	NA
		0.083871	NA
		0.195158	NA
		0.237265	NA
		0.0711118	NA
		0.0600707	NA
		0.509371	NA
		0.196658	NA
		0.282467	NA
		0.152948	NA
		0.185549	NA
		0.257971	NA
		0.132865	NA
		0.116466	NA
		0.0930886	NA
		0.142503	NA
		0.0805627	NA
		0.0251613	NA
		0.938099	NA
		0.123469	NA
		0.117585	NA
		0.118126	NA
		0.109032	NA
		0.0335484	NA
		0.415155	NA
		0.318773	NA
		0.433484	NA
		0.330425	NA
		0.483209	NA
		0.777013	NA
		0.198224	NA
		0.207285	NA
		0.229206	NA
		0.139194	NA
		1.81561	NA
		0.404052	NA
		0.303404	NA
		0.321878	NA
		0.519195	NA
		0.103276	NA
		0.0251613	NA
		0.0620506	NA
		0.267655	NA
		0.404811	NA
		0.445633	NA
		0.250661	NA
		0.220085	NA
		0.434891	NA
		0.228464	NA
		0.243392	NA
		0.388977	NA
		0.24486	NA
		0.206277	NA
		0.497523	NA
		0.346471	NA
		0.094238	NA
		0.738096	NA
		0.792487	NA
	20181211	0.325564	NA
		0.207617	NA
		0.0922581	NA
		0.0839037	NA
		0.662948	NA
		0.215385	NA
		0.131481	NA
		0.1779	NA
		0.215358	NA
		0.186551	NA
		0.0691318	NA
	20190129	0.737116	NA
		0.84548	NA
		0.48805	NA
		0.667265	NA
		1.00396	NA
		0.721101	NA
		0.877691	NA
		0.893832	NA
		0.691291	NA
		0.965396	NA
		1.17318	NA
		0.95558	NA
		0.76327	NA
		0.654859	NA
		1.16498	NA
		0.736485	NA
		0.900176	NA
		1.27241	NA
		1.27827	NA
		0.95557	NA
		0.722377	NA
		0.610037	NA
		0.555407	NA
		0.585314	NA
		0.273679	NA
		0.737942	NA
		1.03606	NA
		0.813892	NA
		0.88025	NA
		0.686845	NA
		0.377421	NA
		0.823749	NA
		0.810519	NA
		0.600069	NA
		0.323585	NA
		0.802233	NA
		0.797813	NA
		0.623132	NA
		0.555521	NA
		1.0119	NA
		0.574455	NA
		1.04174	NA
		0.667995	NA
		0.63072	NA
		0.724795	NA
		1.30308	NA
		0.659829	NA
		0.783366	NA
		0.764099	NA
		0.67728	NA
		0.868384	NA
		1.12386	NA
		0.299132	NA
		0.675218	NA
		0.82204	NA
		0.935636	NA
		0.711201	NA
		0.689213	NA
		0.772152	NA
		0.443615	NA
		0.544391	NA
		0.398793	NA
		1.27229	NA
		0.60862	NA
		0.654906	NA
		0.533874	NA
		0.224774	NA
		0.563798	NA
		0.326665	NA
		0.886414	NA
		0.952529	NA
		0.954646	NA
		0.42128	NA
		0.555258	NA
		0.864102	NA
		0.453744	NA
		0.680042	NA
		0.858391	NA
		0.131228	NA
	20190206	0.0979885	NA
		0.49534	NA
		0.228972	NA
		0.0740449	NA
		0.333688	NA
		0.307208	NA
		0	NA
		0.0523025	NA
		0.101186	NA
		0.554276	NA
		0.149881	NA
		0.234943	NA
		0.0167742	NA
		0.0371429	NA
		0.149028	NA
		0.0554014	NA
		0.330376	NA
		0.116952	NA
		0.209737	NA
		0.188684	NA
		0.0390024	NA
		0.166225	NA
		0.444196	NA
		0.425847	NA
		0.278731	NA
		0.0606896	NA
		0.0607268	NA
		0.0947789	NA
		0.302478	NA
		0.312942	NA
		0.287173	NA
		0.0674074	NA
		0.082432	NA
		0.155297	NA
		0.0928571	NA
		0.345354	NA
		0.156581	NA
		0.0452174	NA
		0.211957	NA
		0.0681293	NA
		0.177697	NA
		0.133319	NA
		0.72545	NA
		0.0370224	NA
		0.161196	NA
		0.13067	NA
		0.082432	NA
		0.0611876	NA
		0.0794437	NA
		0.0681293	NA
		0.438411	NA
		0.148178	NA
		0.193149	NA
		0.0756496	NA
		0.061218	NA
		0.229821	NA
		0.109385	NA
		0.0857729	NA
		0.121434	NA
		0.198765	NA
		0.118618	NA
		0.384936	NA
		0.181749	NA
		0.129766	NA
		0.0579672	NA
		0.178995	NA
		0.204615	NA
		0.0187541	NA
		0.0251613	NA
		0.0725085	NA
		0.20155	NA
		0.437688	NA
		0.173196	NA
		0.0321094	NA

## Sheet: Fig1H
Comparison ectoderm - mesoderm, cell adhesion
		% adhesion on FN				% adhesion on Fc-cadh
			Ecto	Meso		Ecto	Meso
		ave	42.8466	58.1206		57.4093	40.4649
		SD	17.0596	14.594		20.1238	18.8152
		#exp	15	15		13	13
		#cells	4239	2639		5649	6431
		ttest (two-tailed, paired)		5e-06			2.3e-06
			Ecto	Meso		Ecto	Meso
		individual experiments	59.6899	66.9355		75.6044	66.6667
			46.7742	63.4615		68.171	61.0487
			44.697	68.9266		43.0137	27.3469
			53.3019	58.0153		40.7166	20.4969
			62.782	66.4474		78.3198	55.2347
			54.7478	63.1799		79.8828	50.8197
			23.3129	34.375		64.3606	50.8772
			40.3922	48.731		25.5937	19.8777
			13.9059	34.1085		30.1282	11.2583
			45.8015	66.6667		77.907	59.6107
			47.5845	72.1774		67.031	39.1753
			25	53.2787		63.3229	44.8276
			71.4777	82.0359		32.2695	18.8034
			16.5644	34.2857
			36.6667	59.1837

## Sheet: Fig2D
Ectoderm, Rock inhibitor treatment, morphology subtypes
	Ecto CTRL										EY50							EY10						EH						Meso									Stats
		20180920	20191004	20191009	20181212	20190111	20190115	20190118	20190123			20181212	20190111	20190115	20190118	20190123			20190111	20190115	20190118	20190123			20190111	20190115	20190118	20190123			20180920	20191004	20181212	20190111	20190115
count cell types frame20	b	31	45	113	43	24	33	21	38		b	0	0	0	0	0		b	0	6	6	6		b	0	0	0	1		b	6	0	5	2	0				b	E CTRL	EY50	EY10	EH	Meso			ANOVA: Single Factor
	r	0	0	0	0	2	4	0	2		r	1	3	7	3	8		r	7	19	9	1		r	3	5	6	9		r	0	0	0	0	2					0.914894	0	0	0
	p	0	0	0	0	1	0	0	0		p	0	6	22	2	1		p	6	14	11	1		p	10	19	9	4		p	1	0	0	0	0					0.888889	0.130435	0	0				DESCRIPTION
	s	0	3	0	4	0	0	0	1		s	38	18	22	28	17		s	2	6	11	3		s	15	23	31	12		s	68	47	45	10	20					0.891892	0.15	0	0	0.0892857			Group	Count	Sum
	pb	0	1	0	0	0	0	0	2		pb	0	0	0	0	0		pb	0	1	3	4		pb	1	1	1	0		pb	22	0	6	6	0					1	0.4	0	0.0384615	0.111111			Ek	5	4.5794
																																								0.883721		0		0			EY10	4	0.680435
relative fraction	b	1	0.918367	1	0.914894	0.888889	0.891892	1	0.883721			0	0	0	0	0			0	0.130435	0.15	0.4			0	0	0	0.0384615			0.0618557	0	0.0892857	0.111111													EY50	5	0
	r	0	0	0	0	0.0740741	0.108108	0	0.0465116			0.025641	0.111111	0.137255	0.0909091	0.307692			0.466667	0.413043	0.225	0.0666667			0.103448	0.104167	0.12766	0.346154			0	0	0	0													EH	4	0.0384615
	p	0	0	0	0	0.037037	0	0	0			0	0.222222	0.431373	0.0606061	0.0384615			0.4	0.304348	0.275	0.0666667			0.344828	0.395833	0.191489	0.153846			0.0103093	0	0	0													Meso	3	0.200397
	s	0	0.0612245	0	0.0851064	0	0	0	0.0232558			0.974359	0.666667	0.431373	0.848485	0.653846			0.133333	0.130435	0.275	0.2			0.517241	0.479167	0.659574	0.461538			0.701031	1	0.803571	0.555556
	pb	0	0.0204082	0	0	0	0	0	0.0465116			0	0	0	0	0			0	0.0217391	0.075	0.266667			0.0344828	0.0208333	0.0212766	0			0.226804	0	0.107143	0.333333	0												ANOVA
																																			0.0909091												Sources	SS	df
																																			0												Between Groups	2.88389	4
																																			0.909091												Within Groups	0.101221	16
																																			0												Total	2.98511	20
count			48		47	27	37	21	41			39	27	51	33	26			15	45	37	11			28	47	46	26			75	47	50	12
total count	221					173					176							108						147						total count	131		34
average %						E CTRL						E Y50							E Y10						E H								M CTRL
					b	91.5879					b	0						b	17.0109					b	0.961538							b	6.67989		22
					r	4.57388					r	13.4522						r	29.2844					r	17.0357							r	3.0303
					pb	0.930233					pb	0						pb	9.08514					pb	1.91482								14.6825						r	E CTRL	EY50	EY10	EH	Meso			ANOVA: Single Factor
					p	0.740741					p	15.0532						p	26.1504					p	27.1499							p	0							0	0.466667	0.025641	0.103448
					s	2.16724					s	71.4946						s	18.4692					s	52.938							s	75.6073							0.0740741	0.413043	0.111111	0.104167				DESCRIPTION
				SD	b	4.85162					b	0						b	16.7098					b	1.92308							b	5.88699							0.108108	0.225	0.137255	0.12766	0			Group	Count	Sum
					r	4.71102					r	10.5239						r	18.2958					r	11.7736							r	5.24864							0	0.0666667	0.0909091	0.346154	0			Ek	5	0.228694
					pb	2.08006					pb	0						pb	12.1371					pb	1.42498							s	17.0173							0.0465116		0.307692		0.0909091			EY10	4	1.17138
					p	1.65635					p	17.8408						p	14.0428					p	11.7018							p	0														EY50	5	0.672608
					s	3.68628					s	20.7127						s	6.82433					s	8.98551							s	18.1491														EH	4	0.681428
																																															Meso	3	0.0909091
																																															ANOVA
																										Ecto																					ANOVA	SS	df
																										ctrl	Y10	Y50	H	Meso																	Sources	SS	df
																								ave	b	95.9184	17.0109	0	0.961538	6.67989																	Between Groups	0.177378	4
																									r	0	29.2844	13.4522	17.0357	3.0303																	Within Groups	0.200695	16
																									pb	1.02041	9.08514	0	1.91482	14.6825																	Total	0.378073	20
																									p	0	26.1504	15.0532	27.1499	0
																									s	3.06122	18.4692	71.4946	52.938	75.6073
																								SD	b	5.7723	16.7098	0	1.92308	5.88699
																									r	0	18.2958	10.5239	11.7736	5.24864
																									pb	1.44308	12.1371	0	1.42498	17.0173									pb	E CTRL	EY50	EY10	EH	Meso			ANOVA: Single Factor
																									p	0	14.0428	17.8408	11.7018	0										0	0	0	0.0344828
																									s	4.32923	6.82433	20.7127	8.98551	18.1491										0	0.0217391	0	0.0208333				DESCRIPTION
																																								0	0.075	0	0.0212766	0.107143			Group	Count	Sum
																									sum	100	100	100	100	100										0	0.266667	0	0	0.333333			Ek	5	0.0465116
																																								0.0465116		0		0			EY10	4	0.363406
																								total count		173	176	108	147	77																	EY50	5	0
																																															EH	4	0.0765927
																																															Meso	3	0.440476
																																															ANOVA
																																															ANOVA	SS	df
																																															Sources	SS	df
																																															Between Groups	0.0586691	4
																																															Within Groups	0.10445	16
																																															Total	0.163119	20
																																							p	E CTRL	EY50	EY10	EH	Meso			ANOVA: Single Factor
																																								0	0.4	0	0.344828
																																								0.037037	0.304348	0.222222	0.395833				DESCRIPTION
																																								0	0.275	0.431373	0.191489	0			Group	Count	Sum
																																								0	0.0666667	0.0606061	0.153846	0			Ek	5	0.037037
																																								0		0.0384615		0			EY10	4	1.04601
																																															EY50	5	0.752662
																																															EH	4	1.086
																																															Meso	3	0
																																															ANOVA
																																															ANOVA	SS	df
																																															Sources	SS	df
																																															Between Groups	0.275463	4
																																															Within Groups	0.228655	16
																																															Total	0.504118	20
																																							s	E CTRL	EY50	EY10	EH	Meso			ANOVA: Single Factor
																																								0.0851064	0.133333	0.974359	0.517241
																																								0	0.130435	0.666667	0.479167				DESCRIPTION
																																								0	0.275	0.431373	0.659574	0.803571			Group	Count	Sum
																																								0	0.2	0.848485	0.461538	0.555556			Ek	5	0.108362
																																								0.0232558		0.653846		0.909091			EY10	4	0.738768
																																															EY50	5	3.57473
																																															EH	4	2.11752
																																															Meso	3	2.26822
																																															ANOVA
																																															ANOVA	SS	df
																																															Sources	SS	df
																																															Between Groups	1.83645	4
																																															Within Groups	0.281112	16
																																															Total	2.11756	20
[truncated: 16 more columns]

## Sheet: Fig2E
Ectoderm, Rock inhibitor treatment, single cell migration speed, um/min
	Ecto CTRL	E-Y10uM	EY-50uM	E-H	Meso		Stats
# exp	5	4	5	4	4
count	349	196	239	277	142		ANOVA: Single Factor										TUKEY HSD/KRAMER			alpha	0.05
Mean	0.436474	0.747198	0.814949	0.650971	1.48512												group	mean	n	ss	df	q-crit
SD	0.393069	0.312058	0.362745	0.320758	0.872016		DESCRIPTION					Alpha	0.05				Ek	0.436474	349	53.7672
Q1	0.147468	0.554852	0.576984	0.418021	0.783228		Group	Count	Sum	Mean	Variance	SS	Std Err	Lower	Upper		EY10	0.747198	196	18.9891
Minimum	0.0172903	0.105963	0.12	0.0482843	0.135356		Ek	349	152.329	0.436474	0.154503	53.7672	0.0239432	0.389499	0.483449		EY50	0.814949	239	31.317
Median	0.311915	0.735307	0.799085	0.609598	1.28799		EY10	196	146.451	0.747198	0.0973801	18.9891	0.0319497	0.684515	0.809882		EH	0.650971	277	28.3964
Maximum	2.45221	1.77826	2.13592	1.95937	3.71968		EY50	239	194.773	0.814949	0.131584	31.317	0.0289331	0.758183	0.871714		Mk	1.48512	142	107.218
Q3	0.614929	0.908039	0.986926	0.849486	2.01835		EH	277	180.319	0.650971	0.102886	28.3964	0.0268754	0.598243	0.703699				1203	239.688	1198	3.858
SD	0.393069	0.312058	0.362745	0.320758	0.872016		Mk	142	210.887	1.48512	0.760412	107.218	0.0375362	1.41147	1.55876		Q TEST
Mean+SD	0.829543	1.05926	1.17769	0.971729	2.35713												group 1	group 2	mean	std err	q-stat	lower	upper	p-value	mean-crit	Cohen d
Mean-SD	0.0434046	0.43514	0.452203	0.330213	0.613103		ANOVA										Ek	EY10	0.310724	0.0282317	11.0062	0.201806	0.419642	-1.13243e-14	0.108918	0.694673
IQR =Q3-Q1	0.467461	0.353187	0.409943	0.431466	1.23512		Sources	SS	df	MS	F	P value	F crit	RMSSE	Omega Sq		Ek	EY50	0.378475	0.0265556	14.2521	0.276023	0.480926	-1.64091e-13	0.102452	0.84614
1.5*IQR	0.701192	0.52978	0.614914	0.647199	1.85268		Between Groups	114.515	4	28.6287	143.091	4.95875e-100	2.37936	0.882399	0.320862		Ek	EH	0.214497	0.0254515	8.42766	0.116305	0.312689	3.32239e-08	0.0981921	0.479542
Q1-1.5*IQR	-0.553724	0.0250721	-0.03793	-0.229178	-1.06945		Within Groups	239.688	1198	0.200073							Ek	Mk	1.04865	0.0314821	33.3093	0.927187	1.1701	-1.63869e-13	0.121458	2.34441
Q3+1.5*IQR	1.31612	1.43782	1.60184	1.49669	3.87103		Total	354.203	1202	0.294678							EY10	EY50	0.0677506	0.0304788	2.22288	-0.0498365	0.185338	0.515855	0.117587	0.151467
Mean+SD-Q3	0.214614	0.151217	0.190768	0.122242	0.338787												EY10	EH	0.0962272	0.0295218	3.25954	-0.0176677	0.210122	0.143963	0.113895	0.215131
Q1-(Mean-SD)	0.104063	0.119712	0.124781	0.0878076	0.170125												EY10	Mk	0.737921	0.0348551	21.1711	0.60345	0.872392	-1.63869e-13	0.134471	1.64974
Max wo Outliers	1.28289	1.41067	1.56069	1.42122	3.71968												EY50	EH	0.163978	0.0279232	5.87245	0.05625	0.271706	0.000339336	0.107728	0.366598
Min wo Outliers	0.0172903	0.105963	0.12	0.0482843	0.135356												EY50	Mk	0.67017	0.0335119	19.998	0.540881	0.799459	-1.63869e-13	0.129289	1.49827
Maxwoout-Q3	0.667959	0.502633	0.573767	0.571733	1.70133												EH	Mk	0.834148	0.0326439	25.5529	0.708208	0.960088	-1.63869e-13	0.12594	1.86487
Q1-Minwoout	0.130178	0.44889	0.456984	0.369736	0.647872
individual experiments	Ecto CTRL	E-Y10uM	EY-50uM	E-H	Meso
20181212	0.968764	NA	0.682122	NA	0.843024
	0.082432	NA	0.360609	NA	0.51616
	0.253211	NA	0.508413	NA	1.65308
	0.241075	NA	0.624463	NA	0.148576
	0.211579	NA	0.375004	NA	0.737078
	0.680416	NA	0.557064	NA	2.10138
	0.509314	NA	0.518505	NA	1.02057
	0.546721	NA	0.476433	NA	0.648702
	0.172064	NA	0.200149	NA	0.211785
	0.358807	NA	0.513282	NA	0.742162
	0.387749	NA	0.677031	NA	1.13786
	0.321489	NA	0.284785	NA	1.56099
	0.236773	NA	0.196724	NA	0.943651
	0.143122	NA	0.676809	NA	0.713027
	0.0586317	NA	0.312111	NA	1.39302
	0.272379	NA	0.36987	NA	0.608514
	0.186418	NA	0.223616	NA	0.365966
	0.115027	NA	0.540528	NA	0.275113
	0.224694	NA	0.425187	NA	1.12249
	0.694704	NA	0.444413	NA	0.573977
	0.154474	NA	0.514833	NA	0.274138
	0.149285	NA	0.519068	NA	0.353979
	0.194461	NA	0.189459	NA	0.618945
	1.13593	NA	0.637716	NA	1.01156
	1.4031	NA	0.875886	NA	0.878507
	0.359116	NA	0.797011	NA	0.516818
	0.457784	NA	0.285979	NA	1.02682
	0.0355283	NA	1.25775	NA	0.784947
	0.0878308	NA	0.380889	NA	0.590422
	0.080319	NA	0.749524	NA	0.342679
	0.218254	NA	0.430157	NA	1.06242
	0.0470143	NA	0.412047	NA	1.30338
	0.507428	NA	0.252733	NA	1.0514
	0.311915	NA	0.817607	NA	0.598648
	0.149639	NA	0.718523	NA	0.999227
	0.0237223	NA	0.179935	NA	1.17177
	0.0537966	NA	0.313516	NA	1.27678
	0.130885	NA	0.567864	NA	0.411194
	0.119995	NA	0.885692	NA	0.694079
	0.109032	NA	0.536312	NA	0.979097
	0.113539	NA	NA	NA	1.63508
	0.150125	NA	NA	NA	1.28236
	0.0623495	NA	NA	NA	1.77639
	0.320489	NA	NA	NA	1.17645
	0.144726	NA	NA	NA	0.706074
	0.446136	NA	NA	NA	0.688652
	0.253082	NA	NA	NA	0.843283
	NA	NA	NA	NA	1.82363
	NA	NA	NA	NA	0.816744
	NA	NA	NA	NA	1.45652
	NA	NA	NA	NA	0.748966
	NA	NA	NA	NA	0.821852
	NA	NA	NA	NA	0.784317
	NA	NA	NA	NA	1.43824
	NA	NA	NA	NA	0.944926
	NA	NA	NA	NA	1.17999
	NA	NA	NA	NA	NA
20190111	1.14013	1.0312	0.760674	0.773112	2.84243
	0.594708	0.812877	0.911788	0.276718	1.53973
	0.991864	0.246489	0.871071	0.804455	0.667527
	2.45221	0.815096	1.18712	0.315739	1.29363
	0.744482	0.24785	0.680895	0.408555	0.658151
	0.244263	0.486355	1.56069	1.04176	2.30665
	0.224376	0.679037	0.72507	0.73054	1.3469
	0.328801	0.560676	1.21273	1.95937	0.969074
	0.0577778	0.711265	1.87851	0.485773	1.39596
	0.100005	0.564074	0.903014	0.652068	0.77996
	0.0288889	0.791183	0.996662	0.558554	1.45776
	0.0657552	1.03153	0.38821	0.63863	2.01868
	NA	0.201942	2.13592	0.880616	3.41765
	0.232397	1.13478	0.623027	0.587052	2.03338
	0.0785997	0.425909	0.604858	0.809202	1.97453
	0.628545	NA	0.790802	0.92001	0.514812
	0.138887	NA	0.706474	0.882252	1.94588
	0.046496	NA	1.02492	0.319812	0.438393
	0.267672	NA	0.307619	0.535336	2.52098
	0.168878	NA	0.859389	0.73943	1.90709
	0.13841	NA	1.03668	0.440835	NA
	0.148433	NA	0.760967	1.41846	NA
	0.510086	NA	0.87121	0.692303	NA
	0.27743	NA	0.568147	1.16544	NA
	0.428059	NA	0.848329	0.25311	NA
	0.27707	NA	0.758242	0.540473	NA
	0.133163	NA	0.973839	0.26317	NA
	NA	NA	0.908108	0.655266	NA
	NA	NA	0.956259	1.29421	NA
	NA	NA	1.13456	0.452293	NA
	NA	NA	1.06442	0.284395	NA
	NA	NA	0.310814	0.788552	NA
	NA	NA	0.655648	0.301556	NA
	NA	NA	0.585422	0.534667	NA
	NA	NA	NA	0.503561	NA
	NA	NA	NA	0.0794437	NA
	NA	NA	NA	0.754179	NA
	NA	NA	NA	1.15376	NA
	NA	NA	NA	0.175098	NA
	NA	NA	NA	1.20282	NA
	NA	NA	NA	0.858934	NA
	NA	NA	NA	0.837321	NA
	NA	NA	NA		NA
20190115	0.764256	1.33833	0.466102	1.08466	2.97816
	0.784278	1.47028	0.658007	0.813507	3.71968
	1.52311	0.804767	0.612234	0.921587	0.755203
	NA	0.741244	1.1285	0.640422	1.66165
	NA	1.16092	0.655128	0.691332	2.88348
	0.552508	0.67867	0.59957	0.589053	2.28414
	0.0244522	1.07583	0.647523	0.399908	1.86866
	0.212021	0.818957	0.741223	0.965899	2.21549
	1.14524	1.23834	0.891266	0.586133	1.31363
	0.442086	0.711668	0.789958	0.48779	1.16879
	1.15317	0.907546	0.856297	1.01449	1.71667
	0.266858	0.821261	0.508826	0.633073	3.18554
	0.0763232	1.44796	0.965049	0.833717	1.58774
	0.0964193	0.644005	0.372407	0.822957	3.27133
	0.114986	0.718363	1.03001	0.83004	0.52639
	0.187227	0.760038	0.835296	0.780408	2.62099
	0.121032	0.832756	1.03923	1.09982	0.135356
	0.172065	1.04868	1.11006	0.785728	2.34318
	0.146486	0.898351	1.64815	1.24407	0.686554
	0.957012	0.654217	1.32005	0.688865	0.963833
	0.0172903	0.852101	1.20295	1.05625	1.95278
	0.335716	0.993715	1.30935	0.918506	3.1681
	0.981421	0.908204	0.815442	0.622057	2.90425
	1.41876	1.11133	0.897392	0.593021	3.60145
	NA	0.720167	0.980848	0.691992	2.78625
	0.303214	0.850034	1.09679	0.604311	2.78574
	0.125114	0.972882	0.983498	0.63107	1.23108
	0.051871	0.796916	0.979408	1.35553	2.95457
	0.172903	0.771778	0.967812	0.657873	3.06064
	0.156728	0.735425	1.22772	0.905525	1.8945
	0.317275	0.631844	0.623832	0.781364	3.59363
	0.959261	0.641021	1.02506	0.824293	1.61745
	0.441114	0.83369	0.928975	0.687392	NA
	0.669441	0.927543	1.20388	0.860787	NA
	0.297856	0.483093	1.13761	0.795299	NA
	0.351083	0.618361	0.882139	0.591558	NA
	0.411088	0.716584	0.90938	0.872522	NA
	0.992649	0.755674	0.795827	0.877254	NA
	0.294776	0.714775	0.639275	0.693843	NA
	0.865176	0.735264	1.21474	0.702462	NA
	1.94018	0.767656	1.11207	0.945782	NA
	0.222036	1.31984	1.25038	1.21138	NA
	0.74111	0.765235	1.13372	0.834008	NA
	0.27231	0.956384	0.865576	0.635925	NA
	0.844057	1.2141	0.803348	0.948118	NA
	0.312341	0.793571	0.751668	0.36013	NA
	0.31665	0.504765	0.909172	0.579973	NA
	0.400258	0.703438	0.812771	0.685831	NA
	0.0864516	0.719136	1.31093	0.64801	NA
	0.354083	0.671963	1.01138	0.868668	NA
	0.0976952	0.743749	0.631569	0.588136	NA
	0.0244522	0.855342	0.89031	0.420278	NA
	1.36607	1.07001	NA	0.862816	NA
	1.28289	1.23413	NA	0.575503	NA
	1.13417	0.69822	NA	1.14533	NA
	0.739408	0.943108	NA	0.516356	NA
	0.0172903	0.53741	NA	0.840974	NA
	NA	0.446582	NA	0.604198	NA
	0.628682	0.43857	NA	0.655248	NA
	0.524873	0.710135	NA	0.878399	NA
	0.0905333	0.689279	NA	0.929864	NA
	0.125114	0.696073	NA	0.823719	NA
	0.410775	0.970707	NA	0.499682	NA
	0.593428	0.664573	NA	1.09806	NA
	0.0763232	NA	NA	0.891038	NA
	0.350002	NA	NA	0.766747	NA
	0.133277	NA	NA	0.444617	NA
	0.307985	NA	NA	0.582779	NA
	0.132276	NA	NA	0.548587	NA
	1.09211	NA	NA	0.953588	NA
	1.90542	NA	NA	0.450664	NA
	1.23742	NA	NA	0.572811	NA
	1.2645	NA	NA	0.519664	NA
	0.119067	NA	NA	0.604665	NA
	0.31755	NA	NA	0.605313	NA
	0.390923	NA	NA	0.567614	NA
	0.464875	NA	NA	NA	NA
	1.06153	NA	NA	NA	NA
	0.623005	NA	NA	NA	NA
	0.103742	NA	NA	NA	NA
	NA	NA	NA	NA	NA
	1.24664	NA	NA	NA	NA
	1.1499	NA	NA	NA	NA
	0.156728	NA	NA	NA	NA
	NA	NA	NA	NA	NA
	1.47642	NA	NA	NA	NA
	0.0345806	NA	NA	NA	NA
	0.121032	NA	NA	NA	NA
	0.107937	NA	NA	NA	NA
	0.0864516	NA	NA	NA	NA
	0.0590329	NA	NA	NA	NA
	0.117791	NA	NA	NA	NA
	0.882073	NA	NA	NA	NA
	0.724068	NA	NA	NA	NA
	1.47035	NA	NA	NA	NA
	1.06832	NA	NA	NA	NA
	0.324844	NA	NA	NA	NA
	0.497456	NA	NA	NA	NA
	0.0590329	NA	NA	NA	NA
	0.538361	NA	NA	NA	NA
	0.0691613	NA	NA	NA	NA
	0.667705	NA	NA	NA	NA
	0.0763232	NA	NA	NA	NA
	NA	NA	NA	NA	NA
20190118	1.13883	0.615993	0.650996	0.334286	3.41514
	0.634305	0.607671	1.35537	1.7888	3.12047
	0.477904	0.844539	0.710153	0.498802	0.768091
	0.259907	0.861773	0.643122	1.0613	2.48674
	0.454767	0.616821	1.3497	0.666138	1.4266
	0.417607	0.984216	0.620375	0.517418	1.19197
	0.78232	0.376886	0.969105	0.539776	2.08721
	0.286077	0.574198	0.919309	0.415763	1.10944
	0.340131	0.79199	0.553482	1.12415	0.898722
	0.233499	0.398635	1.46274	0.0924264	2.12826
	0.338387	0.91267	0.775335	0.761033	0.52111
	0.333546	0.729926	0.368122	1.14053	1.97646
	0.501546	0.676261	0.950735	0.221924	3.23868
	1.05427	0.386834	1.0075	0.584014	1.42232
	0.312158	1.01274	0.576984	0.361832	3.0309
	0.243305	0.796534	0.852699	0.600668	1.50846
	0.533835	0.838211	1.62068	0.528372	1.8579
	0.502535	0.805894	1.09827	0.681211	1.44989
	0.161635	0.526602	0.683493	0.26	2.0714
	0.390002	0.514281	0.874397	0.331797	0.885982
	0.349566	0.58319	0.614412	0.536695	1.43115
	1.43296	0.887925	0.923301	0.594272	1.57731
	0.562338	0.313022	0.820037	0.228573	2.40913
	0.146503	0.558287	0.892057	0.287897	2.11904
	0.70395	0.371662	0.90195	1.38622	0.904613
	0.411329	0.416679	0.984886	0.938667	1.11277
	0.392046	0.856951	1.36837	0.749646	1.12479
	1.07435	0.668922	0.928186	0.307839	1.91139
	0.28791	0.893868	0.348279	0.672422	0.830351
	0.698335	0.955363	0.799085	0.665726	0.741532
	0.48049	0.502107	1.06584	0.409024	2.17243
	1.90544	1.01477	0.274787	0.943735	1.21405
	0.224237	0.719139	0.917986	0.38105	1.87089
	1.53406	0.537535	0.418612	0.104	2.01824
	0.55454	0.967211	0.355142	0.275363	NA
	0.275765	0.720083	0.32282	0.441123	NA
	0.167148	0.78898	0.771435	0.0741421	NA
	0.238863	0.184919	0.765505	0.739813	NA
	0.183246	0.700291	0.411872	0.634945	NA
	0.716798	0.358296	0.884015	0.389547	NA
	1.7114	1.63744	0.945886	0.510142	NA
	0.786923	0.191188	0.391951	0.540901	NA
	0.405475	0.499817	1.05677	0.154721	NA
	0.116503	0.744354	1.03195	0.790206	NA
	0.217194	0.520154	1.52832	0.446835	NA
	0.122558	1.41067	0.923554	0.487979	NA
	0.03	0.781367	1.41863	0.773572	NA
	0.254676	0.145344	0.825869	0.348968	NA
	0.299274	0.73535	0.87752	0.553461	NA
	0.364434	0.1625	0.942585	0.381516	NA
	0.659395	0.463953	0.571184	0.2924	NA
	0.444535	0.402231	0.657891	0.609273	NA
	0.918934	0.105963	0.807768	0.132426	NA
	0.244721	0.721794	1.72596	0.592801	NA
	0.354181	0.236503	0.870316	0.669756	NA
	0.256392	0.219497	0.240999	0.513271	NA
	0.248126	0.412538	1.01523	0.865516	NA
	0.716422	0.655723	0.669219	0.928773	NA
	0.290095	0.353742	0.92998	0.281386	NA
	0.226119	0.898019	NA	0.265122	NA
	1.21594	0.364126	0.807091	0.12	NA
	0.189508	0.880391	0.693387	0.454192	NA
	0.553453	0.601537	0.477514	0.651381	NA
	0.333156	0.464832	0.627665	0.321224	NA
	0.275373	0.918636	0.12	0.39615	NA
	0.371569	1.77826	0.420764	0.232079	NA
	0.05	0.881397	0.666564	0.489582	NA
	0.691835	0.15016	1.00584	0.764505	NA
	0.18129	0.806978	0.981908	0.485592	NA
	1.20975	0.574718	1.73068	1.2861	NA
	0.545311	1.63166	0.581074	0.92861	NA
	0.164142	0.833776	0.470262	0.548436	NA
	0.240088	0.406263	0.566509	0.291063	NA
	0.206503	1.08348	0.657092	0.143852	NA
	0.136569	1.35677	0.986926	0.275696	NA
	0.672111	0.358891	0.737374	0.228929	NA
	0.323045	0.861026	0.734297	1.04314	NA
	0.428979	0.312895	NA	0.289301	NA
	0.217967	0.108284	NA	0.375089	NA
	0.165373	0.456634	NA	0.567964	NA
	0.730827	1.21655	NA	0.469664	NA
	0.506146	0.337556	NA	0.147734	NA
	0.367315	0.693206	NA	0.35447	NA
	0.507034	0.765406	NA	0.0482843	NA
	0.0516228	0.519752	NA	0.103006	NA
	0.0735917	NA	NA	0.228126	NA
	0.168863	NA	NA	0.286739	NA
	0.140073	NA	NA	0.853573	NA
	0.156883	NA	NA	0.339677	NA
	0.0865685	NA	NA	0.708027	NA
	0.126344	NA	NA	1.21735	NA
	0.136458	NA	NA	1.20713	NA
	0.115952	NA	NA	0.400762	NA
	0.12	NA	NA	1.2287	NA
	0.0839835	NA	NA	0.612509	NA
	0.193137	NA	NA	0.519323	NA
	0.09	NA	NA	0.120244	NA
	0.105765	NA	NA	0.554175	NA
	0.02	NA	NA	0.845399	NA
	0.600738	NA	NA	0.48834	NA
	0.101623	NA	NA	0.987331	NA
	0.26171	NA	NA	0.375394	NA
	0.291785	NA	NA	0.589141	NA
	0.318811	NA	NA	0.870057	NA
	0.113006	NA	NA	0.634655	NA
	0.240198	NA	NA	NA	NA
	0.684977	NA	NA	NA	NA
	0.0965028	NA	NA	NA	NA
	0.380714	NA	NA	NA	NA
	0.240196	NA	NA	NA	NA
	0.314412	NA	NA	NA	NA
	0.245767	NA	NA	NA	NA
	0.140843	NA	NA	NA	NA
	0.0639835	NA	NA	NA	NA
	0.0841421	NA	NA	NA	NA
	0.111231	NA	NA	NA	NA
	0.127213	NA	NA	NA	NA
	0.12	NA	NA	NA	NA
	0.0701976	NA	NA	NA	NA
	0.9103	NA	NA	NA	NA
	0.0323607	NA	NA	NA	NA
	0.220684	NA	NA	NA	NA
	0.169127	NA	NA	NA	NA
	0.0516228	NA	NA	NA	NA
	0.161623	NA	NA	NA	NA
	0.212847	NA	NA	NA	NA
	0.087981	NA	NA	NA	NA
	0.211224	NA	NA	NA	NA
	0.245204	NA	NA	NA	NA
	0.246943	NA	NA	NA	NA
	0.192767	NA	NA	NA	NA
	0.178965	NA	NA	NA	NA
	0.09	NA	NA	NA	NA
	0.137678	NA	NA	NA	NA
	0.1824	NA	NA	NA	NA
	0.43297	NA	NA	NA	NA
	NA	NA	NA	NA	NA
20190123	0.725263	1.70424	0.735527	0.385806	NA
	0.208318	0.920424	0.683491	0.440187	NA
	0.569144	0.750526	0.58531	0.329728	NA
	0.868459	0.567477	1.81653	0.342497	NA
	0.926665	0.571249	1.68822	0.291052	NA
	0.66922	0.557243	1.69775	0.81753	NA
	0.218771	0.54193	1.03867	0.743751	NA
	0.286698	0.554056	1.29487	0.581319	NA
	0.590891	0.223509	1.00949	0.296222	NA
	0.309812	0.677519	2.01243	0.466444	NA
	0.219594	1.03968	0.863598	0.421787	NA
	0.44146	1.17683	1.00258	0.858773	NA
	0.426909	1.35214	1.89687	0.579336	NA
	0.766804	0.373762	0.487776	0.222763	NA
	0.743645	0.956512	1.25247	0.202372	NA
	0.679691	0.985669	0.525311	0.275667	NA
	0.784731	1.14652	1.06569	0.622653	NA
	0.481408	1.01014	0.747401	1.59722	NA
	0.663999	0.702584	1.0031	0.994829	NA
	0.737406	0.355185	0.777073	0.54174	NA
	0.800662	0.74537	0.300404	0.171812	NA
	0.804381	0.936919	0.875491	0.609598	NA
	0.491083	0.68556	0.839786	0.707001	NA
	0.497847	0.866871	0.373571	0.459083	NA
	0.53164	1.25743	0.659605	1.13389	NA
	0.84275	0.939975	0.821469	0.932988	NA
	0.334339	1.36721	0.311327	0.91151	NA
	0.787707	0.801854	0.596612	0.839159	NA
	0.723621	0.614604	0.975331	0.873336	NA
	0.552946	0.65327	0.471629	0.719051	NA
	0.48635	0.740598	0.198	0.598148	NA
	0.574308	0.743964	0.388742	0.889814	NA
	0.418333	NA	0.861108	1.22038	NA
	0.239185	NA	0.704049	1.22061	NA
	0.467892	NA	0.754756	0.373342	NA
	1.6738	NA	1.34004	1.53997	NA
	0.95502	NA	0.577561	0.70257	NA
	0.538162	NA	NA	0.561369	NA
	0.606853	NA	NA	0.61695	NA
	0.940501	NA	NA	0.906068	NA
	0.719343	NA	NA	0.653133	NA
	0.638895	NA	NA	1.02211	NA
	0.38175	NA	NA	0.621591	NA
	NA	NA	NA	0.813326	NA
	NA	NA	NA	0.458376	NA
	NA	NA	NA	0.868674	NA
	NA	NA	NA	1.29299	NA
	NA	NA	NA	0.33768	NA
	NA	NA	NA	1.42122	NA
	NA	NA	NA	0.771186	NA
	NA	NA	NA	0.17179	NA
	NA	NA	NA	0.341044	NA
	NA	NA	NA	0.470059	NA
	NA	NA	NA	0.315083	NA
	NA	NA	NA	NA	NA
	NA	NA	NA	NA	NA
	NA	NA	NA	NA	NA
	NA	NA	NA	NA	NA
	NA	NA	NA	NA	NA
	NA	NA	NA	NA	NA

## Sheet: FigS2C
(Che-MLC) Myosin light chain accumulation at cell cortex
		ratio fluo intensity cortex/cytoplasm
		Ecto	Meso
	# exp	3	3
	count (#cells)	63	60
	Mean	1.4597	1.24819
	SD	0.227891	0.245857
	Q1	1.27358	1.09161
	Minimum	0.99938	0.684697
	Median	1.44338	1.20823
	Maximum	2.10981	2.09986
	Q3	1.5965	1.3823
	SD	0.227891	0.245857
	Mean+SD	1.68759	1.49404
	Mean-SD	1.23181	1.00233
	IQR =Q3-Q1	0.322924	0.290687
	1.5*IQR	0.484386	0.43603
	Q1-1.5*IQR	0.78919	0.655584
	Q3+1.5*IQR	2.08089	1.81833
	Mean+SD-Q3	0.0910898	0.111744
	Q1-(Mean-SD)	0.0417685	0.0892836
	Max wo Outliers	1.92557	1.66173
	Min wo Outliers	1.11241	1.0319
	Maxwoout-Q3	0.329067	0.279426
	Q1-Minwoout	0.161168	0.0597119
	Ftest		0.555304
	Ttest		2.41699e-06
		Ecto	Meso
		1.26155	1.28637
		1.36779	1.38923
		1.32683	1.15536
		1.23436	1.20922
		1.5965	1.21417
		1.46201	1.07757
		1.92557	1.08164
		1.3807	1.20723
		1.5136	1.0319
		1.17126	1.49669
		1.59625	1.66173
		1.43531	1.15468
		1.57027	1.36152
		1.79202	1.45144
		1.44675	2.02013
		2.10981	1.11023
		1.6398	1.40162
		1.95857	1.27478
		1.44338	1.12981
		1.70079	1.42463
		1.29481	1.0233
		1.71435
		1.35555	1.40439
		1.11241	1.52198
		1.41903	1.2519
		1.34461	1.27331
		1.25512	1.01206
		1.65354	1.08633
		1.65814	0.684697
		1.68458	1.23684
		1.23213	1.08304
		1.5653	1.16679
		1.41178	2.09986
		1.3165	0.989365
		1.21042	1.29241
		1.29723	1.20657
		1.25531	1.17374
		1.81225	1.67758
		1.25267	1.23728
		1.58572	1.51241
		1.37495	1.24408
		1.58951	1.49269
		1.4354	1.33618
		1.5214	1.28662
		1.64595	1.11971
		0.99938	1.18793
		1.29724	1.50746
		1.76175	1.23392
		1.51021
		1.48269
		1.55954
		1.1877	1.16547
		1.48797	0.923377
		1.30606	1.0787
		1.8311	1.18103
		1.20923	1.01664
		1.49287	1.05224
		1.27358	0.977426
		1.68201	0.763801
		1.46409	1.10747
		1.17694	1.18411
		1.21219	1.24917
		1.09462	1.52747
			1.18198

## Sheet: Fig3A
RT-qPCR, comparison mesoderm - ectoderm
	GENE	Rnd 1	Rnd 3	Shirin /Dlc2	ArhGAP 5	ArhGAP35
DeltaQ	Mes1	-	0.0645	-	0.0620683	-
	Mes2	-	0.0273	-	0.0392817	-
	Mes3	-	0.0173	-	0.0137922	-
	Mes1	0.233	0.013	0.0329		0.0754
	Mes2	0.288	0.0225	0.0391		0.0912
	Mes3	0.216	0.0149	0.0378		0.06
	MesD			0.095
	MesE	0.488332		0.0458044
	MesF	0.663771		0.0521509
	Ect1	-	0.0321	-	0.0190377	-
	Ect2	-	0.0134	-	0.0339605	-
	Ect3	-	0.00992	-	0.0332616	-
	Ect1	0.0314	0.011	0.0227		0.115
	Ect2	0.0402	0.0197	0.0155		0.0748
	Ect3	0.0265	0.011	0.0334		0.0988
	EctD			0.045
	EctE	0.115305		0.00547647
	EctF	0.0878574		0.00508577
Mean	Meso	0.377821	0.0265833	0.0504592	0.0383807	0.0755333
	Ecto	0.0602524	0.0161867	0.0211937	0.0287532	0.0962
	SD Meso	0.193137	0.0192979	0.0228299	0.0241506	0.0156004
	SD Ecto	0.0392637	0.00856058	0.0158551	0.00842118	0.0202257
Meso/Ecto rel ratios	Mes1/Ect1		2.00935		3.26029
	Mes2/Ect2		2.03731		1.15669
	Mes3/Ect3		1.74395		0.41466
	Mes1/Ect1	7.42038	1.18182	1.44934		0.655652
	Mes2/Ect2	7.16418	1.14213	2.52258		1.21925
	Mes3/Ect3	8.15094	1.18182	1.13174		0.655652
	MesD/EctD			2.11111
	MesE/EctE	4.23515		8.36385
	MesF/EctF	7.5551		10.2543
	AVE	6.90515	1.5494	4.30548	1.61055	0.843519
	SD	1.5359	0.429781	3.95177	1.47611	0.325394
Stats
	t-test pairwise	0.00587948	0.040034	0.00704385	0.324577	0.190428
Meso/Ecto ratio
	T Test: One Sample
	Two Tail	0.0006	0.0003	0.044	0.2	0.046

## Sheet: Fig3F
Rnd1/Shirin depletion, embryo phenotype
						N	Normal lip
	External phenotype (lack of blastopre lip)					P	Partial loss
						C	Complete loss
	COMO					RndMO					ShiMO						stats
# embryos	N	P	C			N	P	C			N	P	C
	8	0	0			NA	NA	NA			0	7	0				ANOVA: Single Factor
	4	0	0			NA	NA	NA			0	8	3
	6	1	0			0	0	9			1	5	3				DESCRIPTION					Alpha	0.05
	7	1	0			0	5	0			1	5	1				Group	Count	Sum	Mean	Variance	SS	Std Err	Lower	Upper
	6	1	0			0	5	0			0	4	0				COMO	11	1045.6	95.0541	47.3111	473.111	2.22515	90.4961	99.6121
																	RndMO	9	38.5027	4.27807	97.8724	782.979	2.45999	-0.760989	9.31714
	22	0	0			0	0	20			0	0	21				ShiMO	11	25.3968	2.3088	26.8902	268.902	2.22515	-2.2492	6.86681
	20	0	0			0	0	18			0	0	20
	13	2	0			0	0	11			0	0	9				ANOVA
	13	0	0			1	0	10			0	0	8				Sources	SS	df	MS	F	P value	F crit	RMSSE	Omega Sq
	10	0	0			5	0	12			0	1	8				Between Groups	59902.5	2	29951.2	549.927	3.37808e-23	3.34039	7.17986	0.972539
	6	0	0			0	0	6			0	0	6				Within Groups	1524.99	28	54.464
total embryos	115	5	0	120	total	6	10	86	102	total	2	30	79	111			Total	61427.5	30	2047.58
	N	P	C			N	P	C			N	P	C				TUKEY HSD/KRAMER			alpha	0.05
%	100	0	0			NA	NA	NA			0	100	0				group	mean	n	ss	df	q-crit
	100	0	0			NA	NA	NA			0	72.7273	27.2727				COMO	95.0541	11	473.111
	85.7143	14.2857	0			0	0	100			11.1111	55.5556	33.3333				RndMO	4.27807	9	782.979
	87.5	12.5	0			0	100	0			14.2857	71.4286	14.2857				ShiMO	2.3088	11	268.902
	85.7143	14.2857	0			0	100	0			0	100	0						31	1524.99	28	3.499
																	Q TEST
	100	0	0			0	0	100			0	0	100				group 1	group 2	mean	std err	q-stat	lower	upper	p-value	mean-crit	Cohen d
	100	0	0			0	0	100			0	0	100				COMO	RndMO	90.776	2.34551	38.702	82.5691	98.983	3.33067e-15	8.20694	12.3003
	86.6667	13.3333	0			0	0	100			0	0	100				COMO	ShiMO	92.7453	2.22515	41.6806	84.9595	100.531	3.33067e-15	7.78579	12.5672
	100	0	0			9.09091	0	90.9091			0	0	100				RndMO	ShiMO	1.96927	2.34551	0.839593	-6.23767	10.1762	0.824619	8.20694	0.26684
	100	0	0			29.4118	0	70.5882			0	11.1111	88.8889
	100	0	0			0	0	100			0	0	100
	COMO					RndMO					ShiMO
	N	P	C			N	P	C			N	P	C
ave	95.0541	4.94589	0			4.27807	22.2222	73.4997			2.3088	37.3475	60.3437
SD	6.87831	6.87831	0			9.89305	44.0959	42.7599			5.18558	42.7294	44.6153
SUMMARY		vegetal
	N	P	C
COMO	95.0541	4.94589	0
RndMO	4.27807	22.2222	73.4997
ShiMO	2.3088	37.3475	60.3437
SD
COMO	6.87831	6.87831	0
RndMO	9.89305	44.0959	42.7599
ShiMO	5.18558	42.7294	44.6153
						N	Normal involution
	Internal phenotype (sagittal view, involution)					P	Partial, weak involution
						C	Complete: No involution
	COMO					RndMO					ShiMO						stats
# embryos	N	P	C			N	P	C			N	P	C
	8	0	0			0	2	5			NA	NA	NA				ANOVA: Single Factor
	4	0	0			0	4	7			NA	NA	NA
	7	0	0			1	0	8			0	0	9				DESCRIPTION					Alpha	0.05
	7	1	0			0	1	6			0	5	0				Group	Count	Sum	Mean	Variance	SS	Std Err	Lower	Upper
	7	0	0			0	3	1			0	1	4				COMO	5	487.5	97.5	31.25	125	2.11549	92.7864	102.214
																	RndMO	5	11.1111	2.22222	24.6914	98.7654	2.11549	-2.49139	6.93583
total embryos	33	1	0	34	total	1	10	27	38	total	0	6	13	19			ShiMO	3	0	0	0	0	2.73109	-6.08525	6.08525
					sagittal					sagittal							ANOVA
%	N	P	C			N	P	C			N	P	C				Sources	SS	df	MS	F	P value	F crit	RMSSE	Omega Sq
	100	0	0			0	28.5714	71.4286									Between Groups	28431.9	2	14215.9	635.305	2.90346e-11	4.10282	11.7667	0.989857
	100	0	0			0	36.3636	63.6364									Within Groups	223.765	10	22.3765
	100	0	0			11.1111	0	88.8889			0	0	100				Total	28655.6	12	2387.97
	87.5	12.5	0			0	14.2857	85.7143			0	100	0
	100	0	0			0	75	25			0	20	80				TUKEY HSD/KRAMER			alpha	0.05
																	group	mean	n	ss	df	q-crit
																	COMO	97.5	5	125
	COMO					RndMO					ShiMO						RndMO	2.22222	5	98.7654
	N	P	C			N	P	C			N	P	C				ShiMO	0	3	0
ave	97.5	2.5	0			2.22222	30.8442	66.9336			0	40	60						13	223.765	10	3.877
SD	5.59017	5.59017	0			4.96904	28.3325	25.6137			0	52.915	52.915				Q TEST
																	group 1	group 2	mean	std err	q-stat	lower	upper	p-value	mean-crit	Cohen d
SUMMARY		sagittal															COMO	RndMO	95.2778	2.11549	45.0381	87.076	103.48	3.83009e-11	8.20176	20.1417
	N	P	C														COMO	ShiMO	97.5	2.44276	39.9139	88.0294	106.971	1.49089e-10	9.47058	20.6114
COMO	97.5	2.5	0														RndMO	ShiMO	2.22222	2.44276	0.909718	-7.24836	11.6928	0.800221	9.47058	0.469776
RndMO	2.22222	30.8442	66.9336
ShiMO	0	40	60
SD
COMO	5.59017	5.59017	0
RndMO	4.96904	28.3325	25.6137
ShiMO	0	52.915	52.915

## Sheet: FigS3AB
Ectoderm, Rock inhibitor treatment, spreading time course
		Ectoderm + Yi 50uM				Ectoderm + Hi 1uM
			count	107			count	34
		min	ave rel area	SD		min	ave rel area	SD
		0	1	0		0	1	0
		2.5	1.01668	0.0467369		2.5	1.02678	0.0348091
		5	1.03658	0.0620558		5	1.0408	0.0446823
		7.5	1.06206	0.0838559		7.5	1.04843	0.0519174
		10	1.07822	0.103736		10	1.06752	0.0592994
		12.5	1.09687	0.121309		12.5	1.07539	0.0724673
		15	1.11467	0.12639		15	1.0883	0.080343
		17.5	1.13632	0.140807		17.5	1.09624	0.0961651
		20	1.15566	0.151296		20	1.10257	0.0961484
		22.5	1.16937	0.160024		22.5	1.10208	0.104163
		25	1.17953	0.167111		25	1.1097	0.109227
		27.5	1.19241	0.176917		27.5	1.11297	0.118526
		30	1.20777	0.186137		30	1.12074	0.13109
		32.5	1.2225	0.18606		32.5	1.1232	0.132164
		35	1.23451	0.18945		35	1.14134	0.145883
		37.5	1.24264	0.192046		37.5	1.1413	0.149481
		40	1.25146	0.193887		40	1.14227	0.146309
		42.5	1.26416	0.198154		42.5	1.14964	0.147707
		45	1.27745	0.198884		45	1.15787	0.145297
		47.5	1.28205	0.202959		47.5	1.17029	0.148613
		50	1.28516	0.204693		50	1.17439	0.149168
		52.5	1.29281	0.218437		52.5	1.17343	0.147405
		55	1.30724	0.213481		55	1.1831	0.152683
		57.5	1.30861	0.217457		57.5	1.1895	0.157096
		60	1.30915	0.210547		60	1.18926	0.152472
		62.5	1.30691	0.209783		62.5	1.19624	0.15945
		65	1.31578	0.206499		65	1.20747	0.154584
		67.5	1.31982	0.219996		67.5	1.21311	0.148258
		70	1.32011	0.215972		70	1.2186	0.148819
		72.5	1.32866	0.21868		72.5	1.21404	0.151065
		75	1.33237	0.22548		75	1.21824	0.14642
		77.5	1.31885	0.207294		77.5	1.21637	0.147895
		80	1.32178	0.208854		80	1.21891	0.145603
		82.5	1.30572	0.213739		82.5	1.23587	0.151456
		85	1.31094	0.20769		85	1.2335	0.151242
		87.5	1.30851	0.200291		87.5	1.23808	0.150641
		90	1.31069	0.199122		90	1.23752	0.144023
		92.5	1.32056	0.196036		92.5	1.23666	0.14911
		95	1.3309	0.197318		95	1.24373	0.148704
		97.5	1.33834	0.204766		97.5	1.23939	0.144507
						100	1.23374	0.145089
						102.5	1.22647	0.141258
						105	1.23323	0.140799
						107.5	1.23257	0.134202
						110	1.24204	0.14402
						112.5	1.24843	0.135695
						115	1.24607	0.131993
						117.5	1.25559	0.137667
						120	1.25901	0.142771
						122.5	1.25988	0.142372
						125	1.25436	0.150136
						127.5	1.25675	0.146069
						130	1.26684	0.149361
						132.5	1.26395	0.150479
						135	1.2509	0.149462
						137.5	1.24708	0.148874
						140	1.24361	0.153664

[truncated: 28 more sheets: FigS3DE, Fig4D, Fig4E, Fig4F, Fig4GH, FigS4AB, FigS4CD, FigS4E, Fig5F, Fig5G, Fig5I, Fig5JK, FigS5A, FigS5B, Fig6A, Fig6C, FigS6E, FigS6F, Fig6H, Fig7C …]
